# Supplementary material for: Aggregation-induced enhancement of peroxidase-mimetic activity of DNAzyme-gold nanoparticles for ultrasensitive detection of lead ions
Source: Royal Society of Chemistry journal article supplement (doi:10.1039/d3ay00399j), 2023-01-01
Supplement: d3ay00399j1.pdf [file d3ay00399j1.pdf]

Supporting Information:

**Aggregation induced enhancement of peroxidase-mimetic activity of DNAzyme-gold nanoparticles for ultrasensitive detection of lead ions**

Haiquan Liu, Yue Zhang, Weiqing Xiong, Xiaoyan Wang\*

*School of Chemistry & Chemical Engineering, Tianjin University of Technology,  
Tianjin 300384, PR China*

---

\* Corresponding author. E-mail address: wangxy7289@126.com

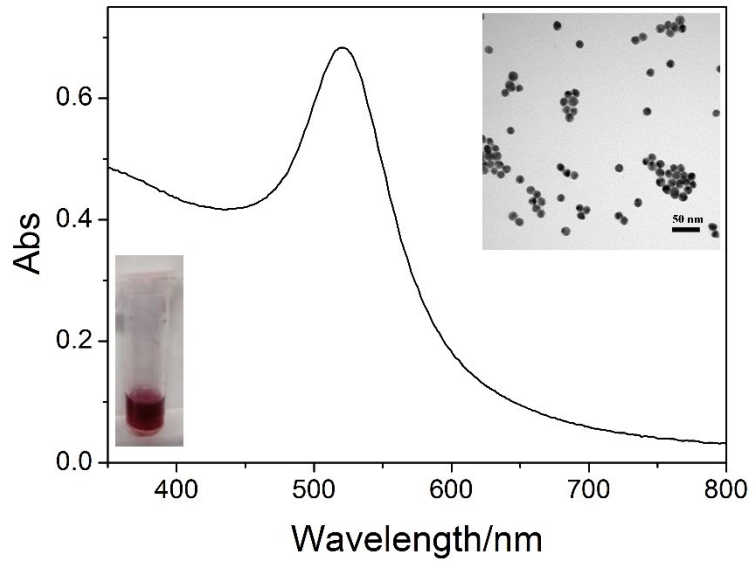

Figure S1. UV-Vis spectrum, photograph (bottom left) and TEM image (top right-hand corner) of AuNPs solution.

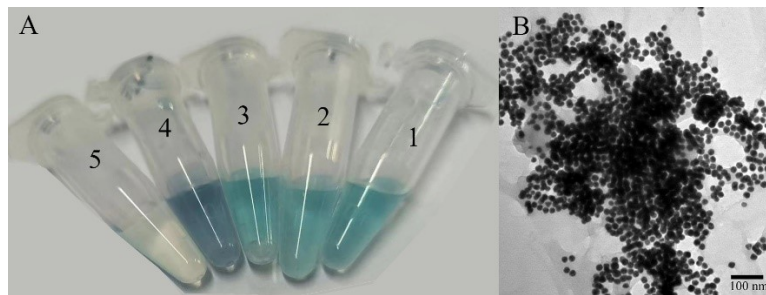

Figure S2. (A) The photos of different reaction systems. (1: DNA<sub>1</sub>-AuNPs + Pb<sup>2+</sup> + TMB + H<sub>2</sub>O<sub>2</sub>, 2: dsDNA-AuNPs + Pb<sup>2+</sup> + TMB + H<sub>2</sub>O<sub>2</sub>, 3: DNA<sub>3</sub>-AuNPs + Pb<sup>2+</sup> + TMB + H<sub>2</sub>O<sub>2</sub>, 4: Mixed AuNPs + Pb<sup>2+</sup> + TMB + H<sub>2</sub>O<sub>2</sub>, 5: Pb<sup>2+</sup> + TMB + H<sub>2</sub>O<sub>2</sub>) (B) The TEM image of sample 4.
